# Supplementary material for: Chemical dynamics study on the gas-phase reaction of the D1-silylidyne radical (SiD; X2Π) with deuterium sulfide (D2S) and hydrogen sulfide (H2S)
Source: Royal Society of Chemistry journal article supplement (doi:10.1039/d1cp01629f), 2021-01-01
Supplement: d1cp01629f6.pdf [file d1cp01629f6.pdf]

Supplementary Information for

**Chemical Dynamics Study on the Gas-Phase Reaction of the D1-Silyldyne Radical (SiD; X<sup>2</sup>Π) with Deuterium Sulfide (D<sub>2</sub>S) and Hydrogen Sulfide (H<sub>2</sub>S)**

Shane J. Goettl,<sup>a</sup> Srinivas Doddipatla,<sup>a</sup> Zhenghai Yang,<sup>a</sup> Chao He,<sup>a</sup> Ralf I. Kaiser<sup>a,\*</sup>

<sup>a</sup> *Department of Chemistry, University of Hawai'i at Manoa, Honolulu, Hawaii 96822, USA*

Corresponding Author: [ralfk@hawaii.edu](mailto:ralfk@hawaii.edu)

Mateus Xavier Silva,<sup>b</sup> Breno R. L. Galvão<sup>b,\*</sup>

<sup>b</sup> *Centro Federal de Educação Tecnológica de Minas Gerais, CEFET-MG, Av. Amazonas 5253, 30421-169 Belo Horizonte, Minas Gerais, Brazil*

Corresponding Author: [brenogalvao@gmail.com](mailto:brenogalvao@gmail.com)

Tom J. Millar<sup>c,\*</sup>

<sup>c</sup> *School of Maths and Physics, Queen's University Belfast, University Road, Belfast BT7 1NN, Northern Ireland*

Corresponding Author: [Tom.Millar@qub.ac.uk](mailto:Tom.Millar@qub.ac.uk)

## Supplementary Note 1. Pulse Sequence.

An optimized pulse sequence (Figure S1) was used to coordinate the data collection. A  $17.0 \pm 0.1$  cm diameter, four-slot ( $0.76 \pm 0.01$  mm) chopper wheel rotating at 120 Hz provided with an infrared photodiode pulse initiated the trigger ( $T_0 = 0 \mu\text{s}$ ) for the synchronization of the equipment. The photodiode sent a 480 Hz signal that was divided to 60 Hz and conveyed to three pulse/delay generators (PDG I-III; DG535, Stanford Research Systems). For the SiD/D<sub>2</sub>S reaction, the PDG I outputs (+4 V, 50  $\Omega$ ) AB ( $A_I = T_0 + 1859 \mu\text{s}$ ,  $B_I = A_I + 80 \mu\text{s}$ ) and CD ( $C_I = A_I - 22 \mu\text{s}$ ,  $D_I = C_I + 80 \mu\text{s}$ ) were sent through a pulse shaper and pulse amplifier (E-421, Physik Instrumente) and were received by the primary and secondary Proch-Trickl<sup>1</sup> pulsed valves, which each contain a piezoelectric disk translator (P-286.23, Physik Instrumente). This allows for a pulsed valve open time of 80  $\mu\text{s}$  when operating at an amplitude of  $-400$  V. The output from PDG I A (TTL, high impedance) was divided to 30 Hz and directed to PDG II and III, which were used for background subtraction. PDG II AB ( $A_{II} = A_I + 16654 \mu\text{s}$ ,  $B_{II} = A_{II} + 5 \mu\text{s}$ ) and CD ( $C_{II} = A_{II} + 186 \mu\text{s}$ ,  $D_{II} = C_{II} + 5$ ) triggered the flashlamps and Q-switch, respectively, of a neodymium-doped yttrium aluminum garnet (Nd:YAG) laser (Quanta-Ray Pro 270, Spectra-Physics) and PDG III AB ( $A_{III} = A_I + 16666.66 \mu\text{s}$ ,  $B_{III} = A_{III} + 5 \mu\text{s}$ ) triggered the MCS. For the SiD/H<sub>2</sub>S reaction, the delay times were as follows: PDG I AB ( $A_I = T_0 + 1868 \mu\text{s}$ ,  $B_I = A_I + 80 \mu\text{s}$ ) and CD ( $C_I = A_I - 22 \mu\text{s}$ ,  $D_I = C_I + 80 \mu\text{s}$ ); PDG II AB ( $A_{II} = A_I + 16643 \mu\text{s}$ ,  $B_{II} = A_{II} + 5 \mu\text{s}$ ) and CD ( $C_{II} = A_{II} + 186 \mu\text{s}$ ,  $D_{II} = C_{II} + 5$ ); PDG III AB ( $A_{III} = A_I + 16666.66 \mu\text{s}$ ,  $B_{III} = A_{III} + 5 \mu\text{s}$ ).

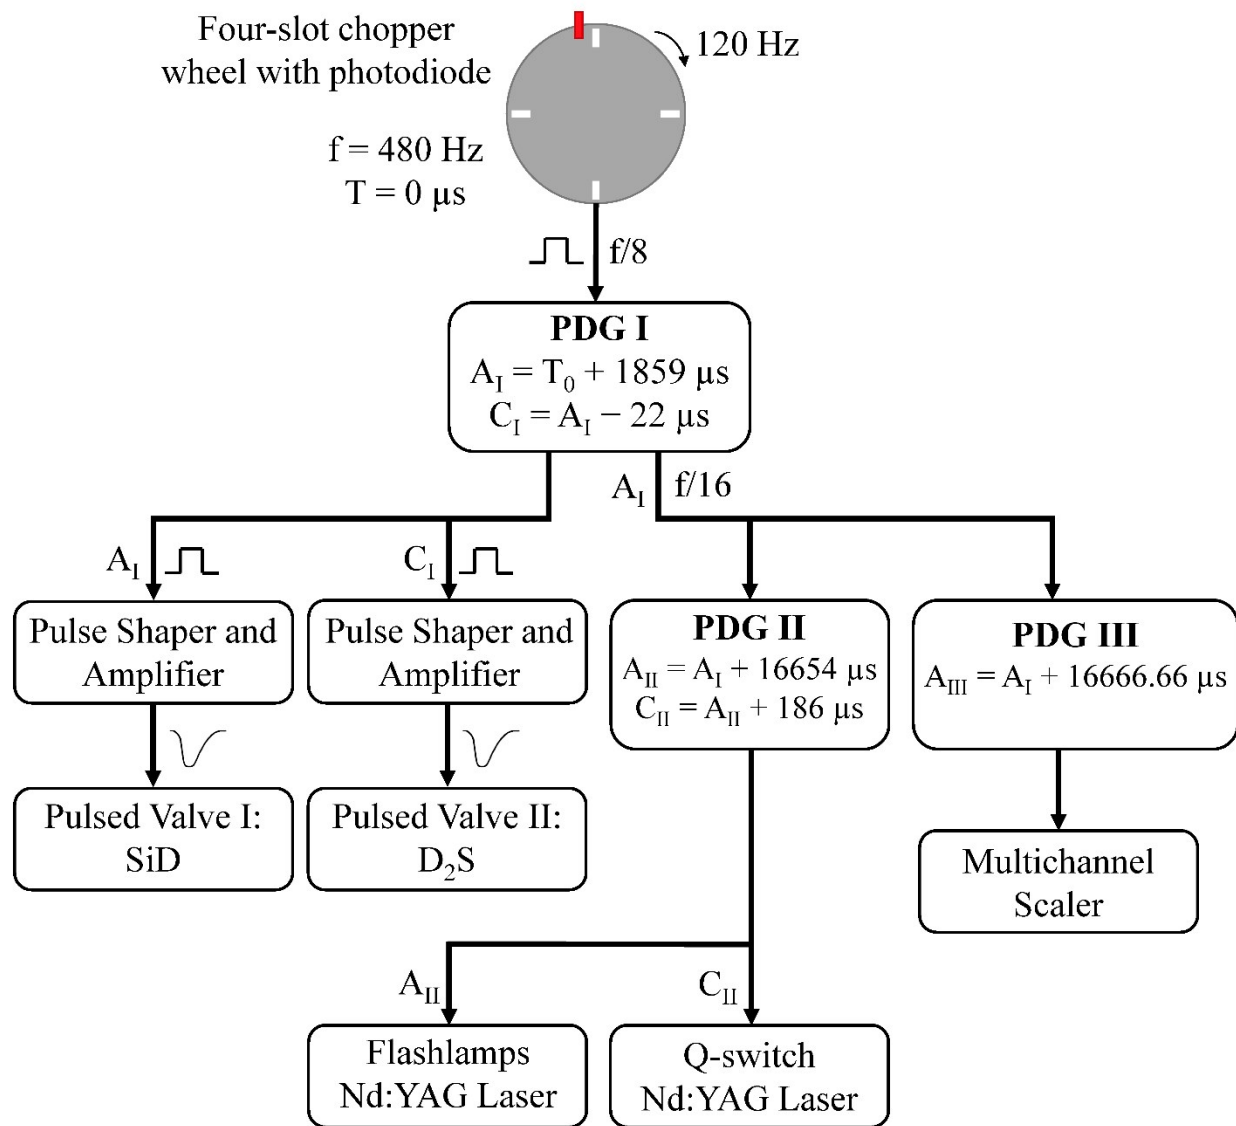

**Figure S1.** Pulse sequence for the crossed molecular beam reaction of the D1-silylidyne radical (SiD; X<sup>2</sup>I) with deuterium sulfide (D<sub>2</sub>S) and hydrogen sulfide (H<sub>2</sub>S).

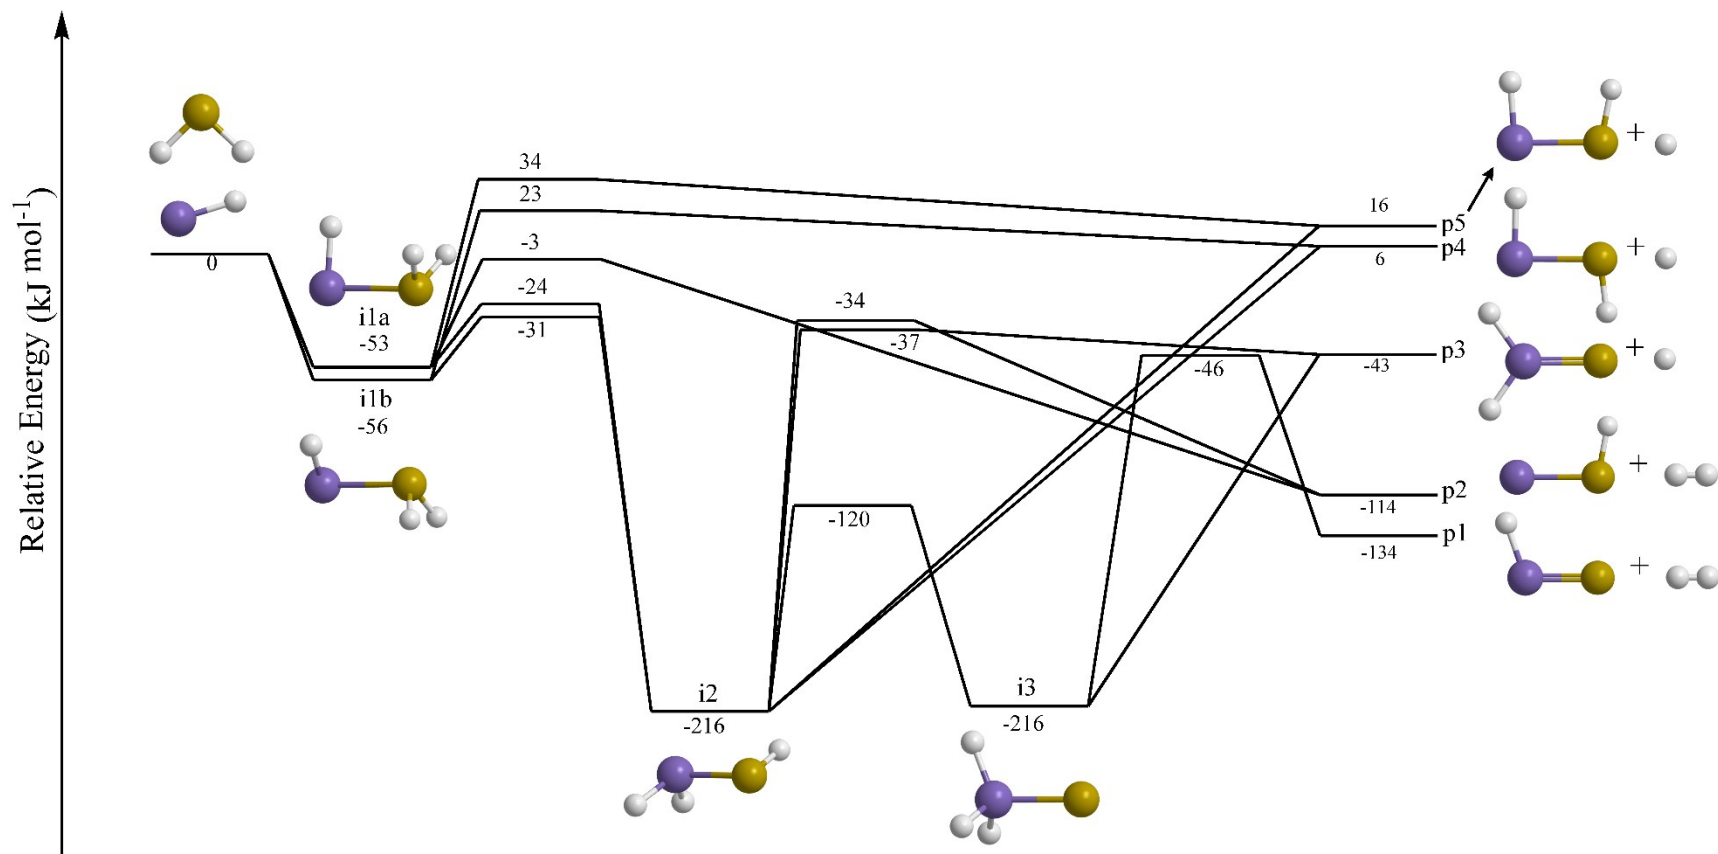

**Figure S2.** Schematic representation of the potential energy surface at the CCSD(T)-F12/aug-cc-pV(T+d)Z//CCSD(T)/aug-cc-pV(T+d)Z+ZPE(CCSD(T)/aug-cc-pV(T+d)Z) level for the non-deuterated ( $\text{H}_2\text{S}+\text{SiH}$ ) case including transition states not accessible in our experiments.

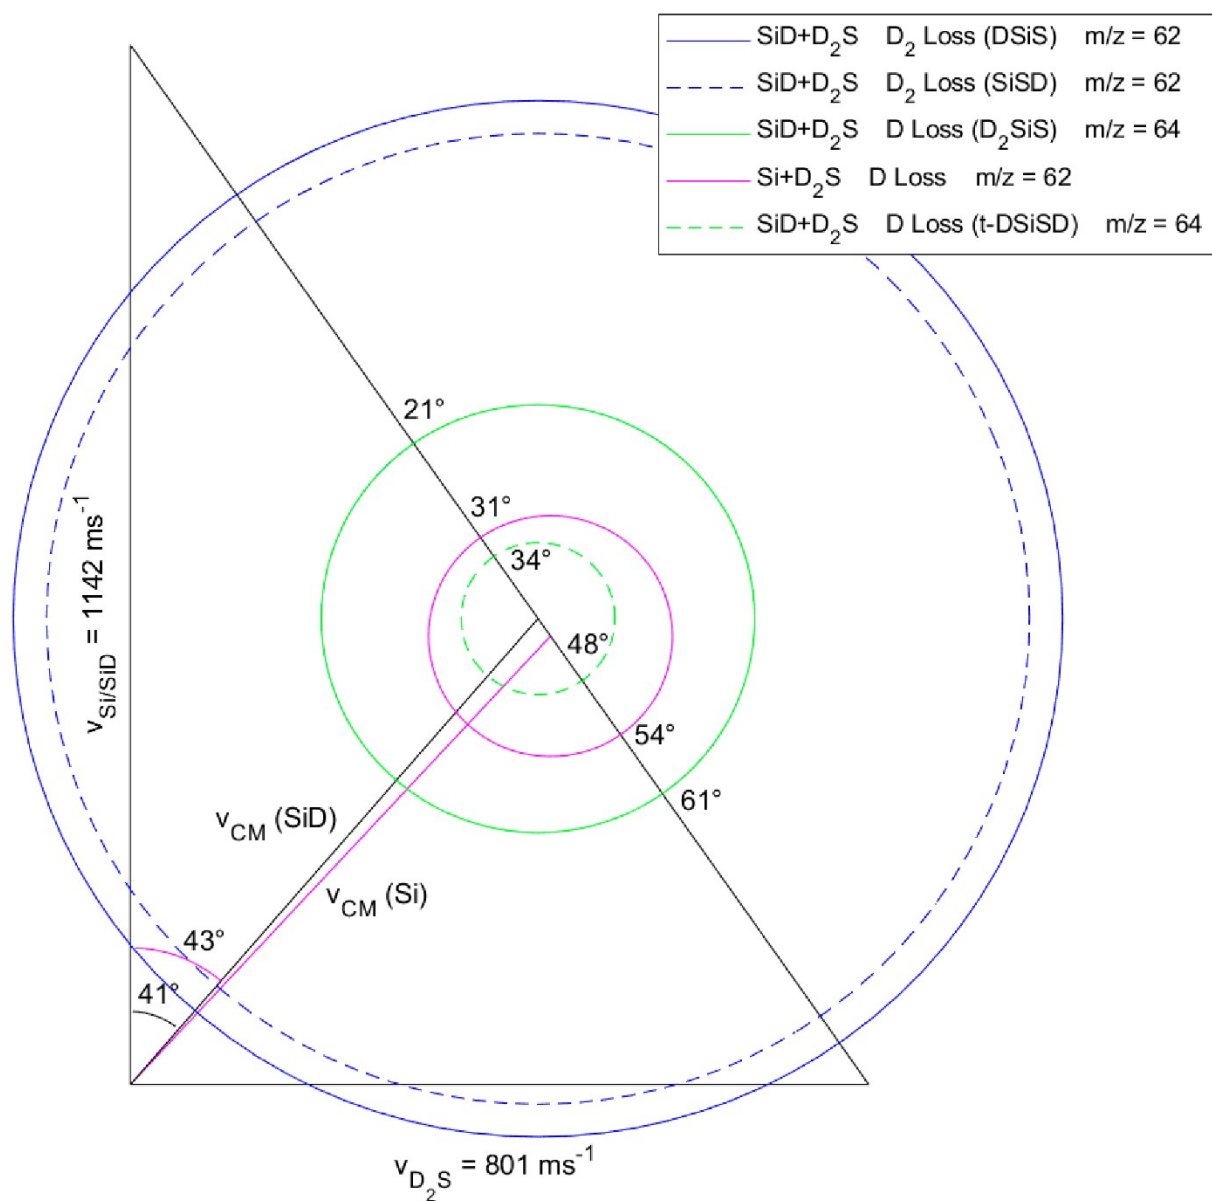

**Figure S3.** Newton circle diagram for the reaction of ground state atomic silicon ( $\text{Si}(^3\text{P})$ ) with deuterium sulfide ( $\text{D}_2\text{S}$ ) and of the D1-silylydyne radical ( $\text{SiD}$ ;  $\text{X}^2\text{II}$ ) with deuterium sulfide ( $\text{D}_2\text{S}$ ). The diagram incorporates all reaction pathways below the reaction collision energy of  $15.9 \text{ kJ mol}^{-1}$ . Each Newton circle has a radius equal to the maximum CM recoil velocity of its corresponding heavy product, and a maximum laboratory angular scattering range for observation of products by the detector.

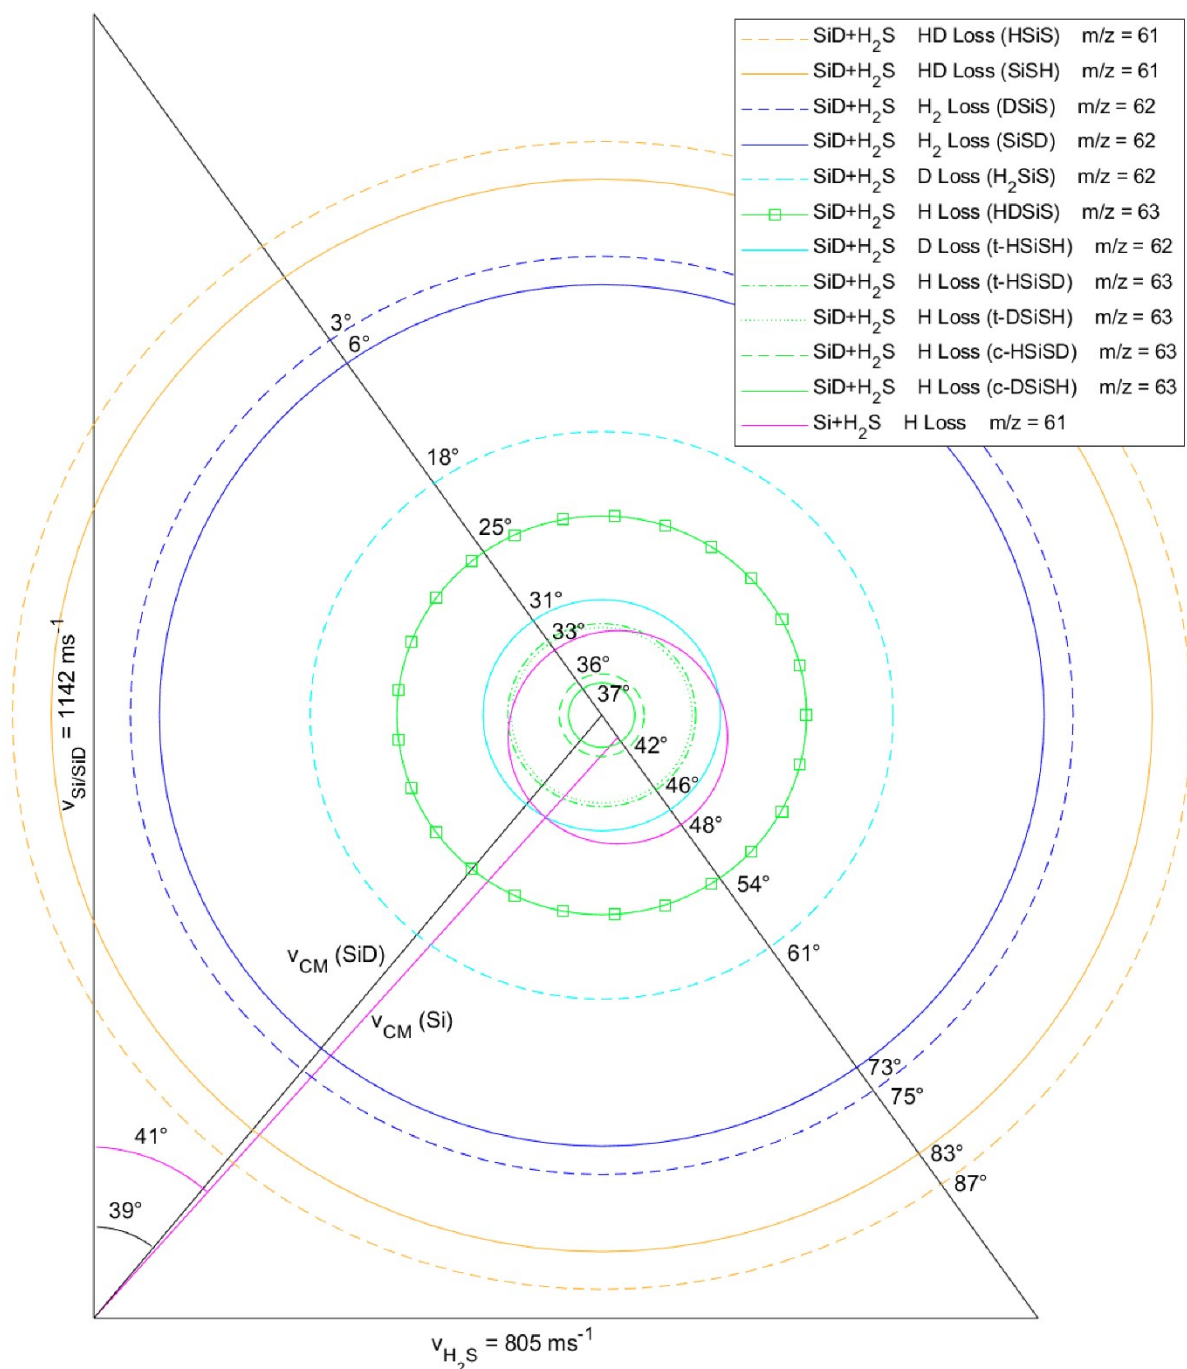

**Figure S4.** Newton circle diagram for the reaction of ground state atomic silicon ( $\text{Si}(^3\text{P})$ ) with hydrogen sulfide ( $\text{H}_2\text{S}$ ) and of D1-silyldyne radical ( $\text{SiD}; \text{X}^2\text{II}$ ) with hydrogen sulfide ( $\text{H}_2\text{S}$ ). The diagram incorporates all reaction pathways below the reaction collision energy of  $15.6 \text{ kJ mol}^{-1}$ . Each Newton circle has a radius equal to the maximum CM recoil velocity of its corresponding heavy product, and a maximum laboratory angular scattering range for observation of products by the detector.

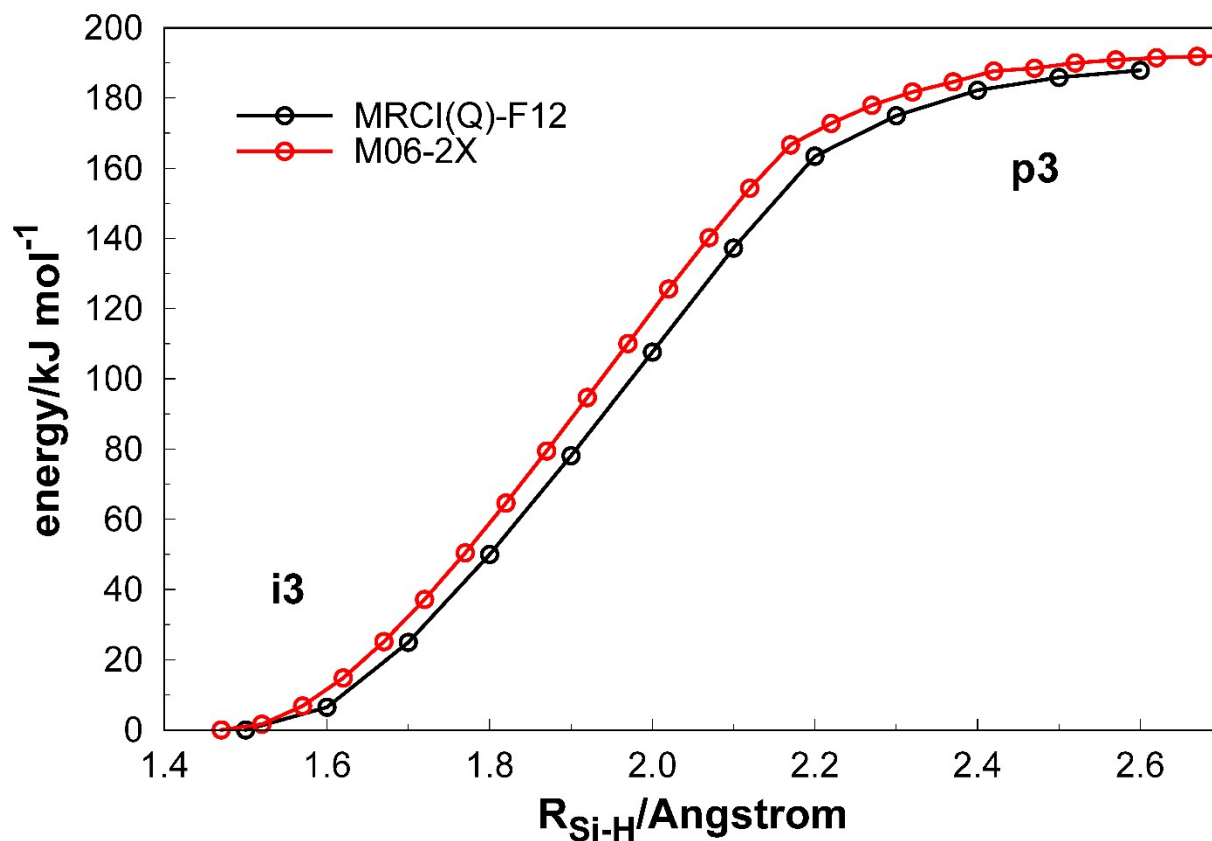

**Figure S5.** Optimized potential energy profile as a function of the Si-H bond for a hydrogen loss from **i3** to **p3**. To confirm the barrierless nature of this path obtained by the exploratory M06-2X/cc-pV(T+d)Z calculations (red line), a full valence CASSCF/cc-pV(T+d)Z optimization followed by single point energy refinement at the MRCI(Q)-F12 level<sup>2</sup> (black line) were performed. The energies are relative to the **i3** optimized structure for each method.

**Table S1.** Optimized Cartesian coordinates (Å) and vibrational frequencies (cm<sup>-1</sup>) for all intermediates, transition states, reactants, and products involved in the SiH+H<sub>2</sub>S reaction at the CCSD(T)/aug-cc-pV(T+d)Z level. The energies are given for all isotopic substitutions considered in this work at the CCSD(T)-F12/aug-cc-pV(T+d)Z//CCSD(T)/aug-cc-pV(T+d)Z+ZPE(M06-2X/cc-pV(T+d)Z) level in kJ mol<sup>-1</sup>.

E(D0) – gives the energy of the non-deuterated case

E(D1) – gives the energy for one deuterium at the first position of the Cartesian coordinates

E(D2) – gives the energy for one deuterium at the second position of the Cartesian coordinates

E(D3) – gives the energy for one deuterium at the third position of the Cartesian coordinates

E(D1,D2,D3) – gives the energy of the fully deuterated case

| Species                                                                                                                                        | Vibrational Frequencies (cm <sup>-1</sup> )                                                | Relative Energy (kJ mol <sup>-1</sup> )                                       | Cartesian Coordinates (Å) |               |               |               |
|------------------------------------------------------------------------------------------------------------------------------------------------|--------------------------------------------------------------------------------------------|-------------------------------------------------------------------------------|---------------------------|---------------|---------------|---------------|
|                                                                                                                                                |                                                                                            |                                                                               | Atom                      | X             | Y             | Z             |
| SiH<br>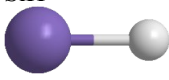<br>T1 diagnostic:<br>0.01362941                       | 2027.38                                                                                    |                                                                               | H                         | 0.000000000   | 0.000000000   | -0.7626723064 |
|                                                                                                                                                |                                                                                            |                                                                               | Si                        | 0.000000000   | 0.000000000   | 0.7626723064  |
| H <sub>2</sub> S<br><br>T1 diagnostic:<br>0.01105045        | 1211.38<br>2715.39<br>2730.68                                                              |                                                                               | H                         | 0.1196696836  | 0.000000000   | 1.2667032628  |
|                                                                                                                                                |                                                                                            |                                                                               | H                         | 1.2341510522  | 0.000000000   | -0.3094033975 |
|                                                                                                                                                |                                                                                            |                                                                               | S                         | -0.0810267358 | 0.000000000   | -0.0572948654 |
| i1b: HSiSH <sub>2</sub><br><br>T1 diagnostic:<br>0.01489830 | 174.21<br>238.94<br>446.28<br>468.34<br>796.91<br>1208.04<br>1999.73<br>2652.97<br>2702.15 | E(D0)=-55.8<br>E(D1)=-58.9<br>E(D2)=-57.1<br>E(D3)=-58.5<br>E(D1,D2,D3)=-58.7 | H                         | 0.0003935060  | 1.0090222955  | -1.7724994770 |
|                                                                                                                                                |                                                                                            |                                                                               | H                         | 0.2609873303  | -1.3482916268 | 1.1494632907  |
|                                                                                                                                                |                                                                                            |                                                                               | H                         | -0.3697756867 | -0.8893485662 | -1.9052899747 |
|                                                                                                                                                |                                                                                            |                                                                               | S                         | 0.4981237979  | -0.1131821796 | -1.2315483277 |
|                                                                                                                                                |                                                                                            |                                                                               | Si                        | -0.3915017593 | 0.0288457448  | 1.0390615819  |
| i1a: HSiSH <sub>2</sub><br><br>T1 diagnostic:<br>0.01477086 | 163.46<br>225.90<br>432.76<br>436.28<br>722.54<br>1206.31<br>1997.86<br>2673.89<br>2679.92 | E(D0)=-52.5<br>E(D1)=-53.8<br>E(D2)=-55.3<br>E(D3)=-55.3<br>E(D1,D2,D3)=-55.2 | H                         | -0.0015617101 | 1.4809419224  | 1.2122198795  |
|                                                                                                                                                |                                                                                            |                                                                               | H                         | 0.9684244707  | 0.7933280396  | -1.4670774062 |
|                                                                                                                                                |                                                                                            |                                                                               | H                         | -0.9700785413 | 0.7912018574  | -1.4669068765 |
|                                                                                                                                                |                                                                                            |                                                                               | S                         | 0.0001568099  | -0.0785599453 | -1.1402225695 |
|                                                                                                                                                |                                                                                            |                                                                               | Si                        | 0.0003314886  | -0.0422403169 | 1.3297447969  |



|                                                                                                                                              |                                                                                              |                                                                                    |                                                                                                                                                                                                                                     |
|----------------------------------------------------------------------------------------------------------------------------------------------|----------------------------------------------------------------------------------------------|------------------------------------------------------------------------------------|-------------------------------------------------------------------------------------------------------------------------------------------------------------------------------------------------------------------------------------|
| i2: H <sub>2</sub> SiSH<br>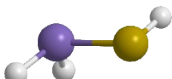<br>T1 diagnostic:<br>0.01852358 | 233.70<br>513.08<br>553.07<br>682.20<br>812.49<br>913.13<br>2184.91<br>2229.17<br>2698.40    | E(D0)=-215.8<br>E(D1)=-217.8<br>E(D2)=-218.3<br>E(D3)=-217.8<br>E(D1,D2,D3)=-218.3 | H -0.0725257577 1.2400496850 -1.7198885632<br>H 0.1391215870 -1.2863381361 1.1445888941<br>H -0.2081773596 -1.1918438291 -1.8938658389<br>S -0.2467688427 -0.0247930143 0.8992717405<br>Si 0.3865775612 -0.0500290377 -1.1509191393 |
| i3: H <sub>3</sub> SiS<br><br>T1 diagnostic:<br>0.01299818  | 429.05<br>495.46<br>560.88<br>920.45<br>922.13<br>972.38<br>2228.05<br>2245.06<br>2247.13    | E(D0)=-215.4<br>E(D1)=-217.8<br>E(D2)=-217.8<br>E(D3)=-217.8<br>E(D1,D2,D3)=-218.5 | H -0.7053306888 1.2064166061 -1.6057582649<br>H -0.7055177224 -1.2064663757 -1.6057202364<br>H 1.3978469431 0.0001254761 -1.5012968320<br>S 0.0476275678 -0.0000044712 1.0530729633<br>Si -0.0251973911 -0.0000712355 -1.0877839074 |
| TS: i1a – i1b<br><br>T1 diagnostic:<br>0.01454585          | 167.91 i<br>220.82<br>418.86<br>457.26<br>716.51<br>1202.10<br>2003.06<br>2676.95<br>2711.73 | E(D0)=-51.0<br>E(D1)=-53.8<br>E(D2)=-52.1<br>E(D3)=-53.8<br>E(D1,D2,D3)=-53.5      | H -0.0123311133 -1.0289923027 -1.7210828235<br>H -0.4036145457 -1.3040386741 0.9045779622<br>H -0.4252254333 0.8680813375 -1.7419544033<br>S 0.5915338944 0.0987905737 -1.3200351844<br>Si 0.2478643861 0.0532047334 1.1576815421   |
| TS: i1a – i2<br><br>T1 diagnostic:<br>0.01908338          | 704.89 i<br>349.94<br>402.62<br>536.41<br>744.64<br>930.92<br>1414.00<br>2043.09<br>2706.86  | E(D0)=-23.9<br>E(D1)=-26.7<br>E(D2)=-24.1<br>E(D3)=-25.5<br>E(D1,D2,D3)=-24.2      | H 1.0761229146 -0.1720676996 -0.9023103276<br>H -0.7688441944 -0.6486134386 -0.0888945962<br>H 0.8694153546 -0.7814042028 1.5894413571<br>S -0.0347175877 0.5575801979 -0.7267120551<br>Si -0.4993555372 -0.1230668568 1.5775944418 |
| TS: i1b – i2<br><br>T1 diagnostic:<br>0.01915692          | 665.39 i<br>351.03<br>480.76<br>523.13<br>837.38<br>1039.69<br>1458.06<br>2039.71<br>2694.48 | E(D0)=-30.3<br>E(D1)=-31.9<br>E(D2)=-33.3<br>E(D3)=-30.8<br>E(D1,D2,D3)=-31.1      | H -0.1581234079 1.1760144278 -1.7294475338<br>H 0.2362076436 -1.4070535429 0.8917866757<br>H -0.5435573903 -0.8584828748 -0.8698758097<br>S -0.3825350130 -0.2739811602 0.5255274234<br>Si 0.8462353561 0.0505488177 -1.5388036623  |

|                                                                                                                                             |                                                                                               |                                                                                    |                                                                                                                                                                                                                                     |
|---------------------------------------------------------------------------------------------------------------------------------------------|-----------------------------------------------------------------------------------------------|------------------------------------------------------------------------------------|-------------------------------------------------------------------------------------------------------------------------------------------------------------------------------------------------------------------------------------|
| TS: i1a – SiSH<br>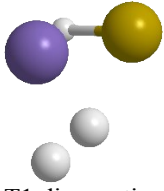<br>T1 diagnostic:<br>0.01532170         | 1174.19 i<br>332.28<br>361.24<br>618.28<br>987.42<br>1091.37<br>1453.78<br>1766.31<br>2674.03 | E(D0)=-3.3<br>E(D1)=-6.0<br>E(D2)=-3.8<br>E(D3)=-4.9<br>E(D1,D2,D3)=-3.7           | H -0.1627126861 0.4575626717 -2.0988434848<br>H 0.2137768879 -0.9266738266 -0.4886360802<br>H -0.3351369496 -1.4120897042 0.2937734088<br>S 0.8257018958 0.4269246957 -1.1896799672<br>Si -0.5434019598 0.1413218312 0.7625732166   |
| TS: i1b – t-<br>HSiSH<br><br>T1 diagnostic:<br>0.02953411  | 816.29 i<br>208.83<br>365.75<br>496.51<br>609.96<br>708.31<br>916.52<br>2051.05<br>2695.95    | E(D0)=23.1<br>E(D1)=19.9<br>E(D2)=21.3<br>E(D3)=25.9<br>E(D1,D2,D3)=25.1           | H -0.0016860697 0.9876538231 -1.5372396614<br>H 0.3354538983 -1.2327832020 1.3619182647<br>H -0.5264501878 -1.0174605390 -2.5129845076<br>S 0.4616446767 -0.1586981065 -1.0186298335<br>Si -0.2707351293 0.1083336920 0.9861228309  |
| TS: i1a – c-<br>HSiSH<br><br>T1 diagnostic:<br>0.02930655 | 835.11 i<br>224.29<br>345.35<br>485.56<br>585.34<br>715.16<br>801.20<br>2046.20<br>2705.70    | E(D0)=33.7<br>E(D1)=32.0<br>E(D2)=30.7<br>E(D3)=36.5<br>E(D1,D2,D3)=35.9           | H 0.2645467141 -1.2028860774 1.4591198480<br>H 0.8308947216 -1.1168827663 -1.0001363218<br>H 2.0303767102 0.7203788712 -1.5495965466<br>S 0.2557350098 0.0912969574 -0.9377358263<br>Si -0.3630780658 0.1421572551 1.1388969768     |
| TS: i2 – i3<br><br>T1 diagnostic:<br>0.01427596          | 1341.90 i<br>515.82<br>566.72<br>595.20<br>628.29<br>930.80<br>1710.96<br>2235.65<br>2263.05  | E(D0)=-119.9<br>E(D1)=-122.0<br>E(D2)=-122.0<br>E(D3)=-119.9<br>E(D1,D2,D3)=-120.0 | H -0.8280755407 1.2332114783 -1.7675479778<br>H -0.8367543593 -1.2335779015 -1.7580963620<br>H 1.3454283731 -0.0037506674 -0.6965108041<br>S 0.5398447628 0.0044872355 0.7156201412<br>Si -0.2110145273 -0.0003701452 -1.2409512748 |
| TS: i2 – SiSH<br><br>T1 diagnostic:<br>0.03228793        | 1212.81 i<br>388.72<br>477.73<br>500.79<br>662.48<br>836.70<br>1591.31<br>1691.91<br>2685.50  | E(D0)=-34.2<br>E(D1)=-34.8<br>E(D2)=-37.0<br>E(D3)=-34.3<br>E(D1,D2,D3)=-33.5      | H -0.2389002069 0.7887057229 -1.6180597204<br>H 0.3179559118 -1.0120199990 1.4521525533<br>H -0.3719666851 -0.4954450728 -2.1705816973<br>S -0.4747746828 -0.2376083375 0.6941427583<br>Si 0.7659128513 -0.3565866458 -1.0784668007 |

|                                                                                                                                                  |                                                                                             |                                                                                                                         |                                                                                                                                                                                                                                    |
|--------------------------------------------------------------------------------------------------------------------------------------------------|---------------------------------------------------------------------------------------------|-------------------------------------------------------------------------------------------------------------------------|------------------------------------------------------------------------------------------------------------------------------------------------------------------------------------------------------------------------------------|
| TS: i2 – H <sub>2</sub> SiS<br>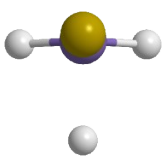<br>T1 diagnostic:<br>0.02249936 | 560.50 i<br>126.59<br>195.81<br>610.61<br>611.15<br>701.52<br>996.69<br>2241.15<br>2257.05  | E(D0)=-36.3<br>E(D1)=-33.2<br>E(D2)=-38.5<br>E(D3)=-38.5<br>E(D1,D2,D3)=-33.3                                           | H -0.0031480161 -1.9327522017 1.9285719718<br>H 1.2150637956 -0.1015826553 -1.8482330848<br>H -1.2155844270 -0.0977248266 -1.8474330501<br>S 0.0004609955 0.0988763472 0.9482859326<br>Si 0.0001085382 -0.0201381253 -1.0106728362 |
| TS: i3 – HSiS<br><br>T1 diagnostic:<br>0.02758986               | 972.79 i<br>438.88<br>510.13<br>675.63<br>879.78<br>958.69<br>1519.46<br>1928.36<br>2287.49 | E(D0)=-45.6<br>E(D1)=-46.3<br>E(D2)=-47.9<br>E(D3)=-46.7<br>E(D1,D2,D3)=-45.3                                           | H 0.0134612112 1.0221655240 -1.7044330334<br>H -0.8773267545 -1.1131920597 -1.6882748693<br>H 0.8748438347 0.5007529830 -1.7582971504<br>S -0.0025648348 -0.0334602251 1.1721801991<br>Si 0.0010152520 -0.3762662225 -0.7686614234 |
| H <sub>2</sub><br><br>T1 diagnostic:<br>0.00601239              | 4400.22                                                                                     |                                                                                                                         | H 0.0000000000 0.0000000000 0.3715191784<br>H 0.0000000000 0.0000000000 -0.3715191784                                                                                                                                              |
| HSiS<br><br>T1 diagnostic:<br>0.03565980                       | 577.18<br>692.59<br>2029.11                                                                 | E(HSiS+H <sub>2</sub> )=-133.9<br>E(DSiS+H <sub>2</sub> )=-134.8<br>E(HSiS+HD)=-134.0<br>E(DSiS+D <sub>2</sub> )=-131.3 | H 0.0000000000 1.2374246601 -1.7921712477<br>S 0.0000000000 0.0106422259 0.9596721427<br>Si 0.0000000000 -0.0512338506 -1.0060931678                                                                                               |
| SiSH<br><br>T1 diagnostic:<br>0.01827924                      | 510.32<br>667.54<br>2630.06                                                                 | E(SiSH+H <sub>2</sub> )=-114.5<br>E(SiSD+H <sub>2</sub> )=-116.6<br>E(SiSH+HD)=-114.6<br>E(SiSD+D <sub>2</sub> )=-113.1 | H 0.0000000000 1.1799831517 -1.5695610837<br>S 0.0000000000 -0.1125267945 -1.1904889181<br>Si 0.0000000000 0.1293766784 0.9214577290                                                                                               |
| H <sub>2</sub> SiS<br><br>T1 diagnostic:<br>0.01747638        | 614.44<br>636.23<br>717.46<br>1005.81<br>2236.96<br>2249.80                                 | E(D0)=-42.3<br>E(D1)=-44.4<br>E(D2)=-44.4<br>E(D1,D2)=-38.7                                                             | H -0.0022686497 1.2202515430 -1.8556186086<br>H 0.0054933914 -1.2015802377 -1.8408225640<br>S -0.0048384390 0.0264361371 0.9542773806<br>Si -0.0003070689 0.0145171489 -0.9990731088                                               |
| t-HSiSH<br><br>T1 diagnostic:<br>0.01672500                   | 516.99<br>626.36<br>634.15<br>912.17<br>2048.92<br>2683.39                                  | E(D0)=6.0<br>E(D1)=3.0<br>E(D2)=4.2<br>E(D1,D2)=9.1                                                                     | H -1.1009437415 0.0000000000 2.4062455267<br>H 1.2741902382 0.0000000000 -0.3788405158<br>S 0.1788465601 0.0000000000 1.9996623518<br>Si -0.2184420568 0.0000000000 -0.0951663628                                                  |

|                                                                                                                                       |         |               |    |               |               |               |
|---------------------------------------------------------------------------------------------------------------------------------------|---------|---------------|----|---------------|---------------|---------------|
| 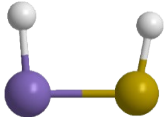 <p>c-HSiSH</p> <p>T1 diagnostic:<br/>0.01699851</p> | 507.66  | E(D0)=15.7    | H  | -0.0000960212 | 1.2924313596  | -1.2088926370 |
|                                                                                                                                       | 536.78  | E(D1)=13.0    | H  | 0.0004095851  | 1.4406316565  | 1.3034694552  |
|                                                                                                                                       | 662.19  | E(D2)=14.1    | S  | -0.0003580214 | -0.0310749324 | -0.9922990305 |
|                                                                                                                                       | 807.13  | E(D1,D2)=19.1 | Si | 0.0000265565  | -0.0702965394 | 1.1528746985  |
|                                                                                                                                       | 2045.24 |               |    |               |               |               |
|                                                                                                                                       | 2696.53 |               |    |               |               |               |
|                                                                                                                                       |         |               |    |               |               |               |

**Table S2.** Physical parameters adopted for the Orion sources.

|                                     | Orion Hot Core         | Orion Plateau          | Orion 15.5 km s <sup>-1</sup><br>component |
|-------------------------------------|------------------------|------------------------|--------------------------------------------|
| n(H <sub>2</sub> ) cm <sup>-3</sup> | 5 × 10 <sup>7</sup>    | 10 <sup>6</sup>        | 5 × 10 <sup>6</sup>                        |
| T (K)                               | 225                    | 125                    | 200                                        |
| N(H <sub>2</sub> ) cm <sup>-2</sup> | 4.2 × 10 <sup>23</sup> | 2.1 × 10 <sup>23</sup> | 10 <sup>23</sup>                           |

**Table S3.** D and D<sub>2</sub> loss product mass combinations of silicon and sulfur isotopes from the reaction of ground state atomic silicon (Si(<sup>3</sup>P)) and deuterium sulfide (D<sub>2</sub>S; X<sup>1</sup>A<sub>1</sub>). Isotope abundance given in parenthesis.

| <b>Si + D<sub>2</sub>S</b> |                                 | <b>D<sub>2</sub><sup>32</sup>S</b><br>(94.93%)<br>36 | <b>D<sub>2</sub><sup>33</sup>S</b><br>(0.76%)<br>37 | <b>D<sub>2</sub><sup>34</sup>S</b><br>(4.29%)<br>38 | <b>D<sub>2</sub><sup>36</sup>S</b><br>(0.02%)<br>40 |
|----------------------------|---------------------------------|------------------------------------------------------|-----------------------------------------------------|-----------------------------------------------------|-----------------------------------------------------|
| <b>D Loss</b>              | <sup>28</sup> Si (92.23%)<br>28 | <sup>28</sup> Si <sup>32</sup> SD<br>62              | <sup>28</sup> Si <sup>33</sup> SD<br>63             | <sup>28</sup> Si <sup>34</sup> SD<br>64             | <sup>28</sup> Si <sup>36</sup> SD<br>66             |
|                            | <sup>29</sup> Si (4.68%)<br>29  | <sup>29</sup> Si <sup>32</sup> SD<br>63              | <sup>29</sup> Si <sup>33</sup> SD<br>64             | <sup>29</sup> Si <sup>34</sup> SD<br>65             | <sup>29</sup> Si <sup>36</sup> SD<br>67             |
|                            | <sup>30</sup> Si (3.09%)<br>30  | <sup>30</sup> Si <sup>32</sup> SD<br>64              | <sup>30</sup> Si <sup>33</sup> SD<br>65             | <sup>30</sup> Si <sup>34</sup> SD<br>66             | <sup>30</sup> Si <sup>36</sup> SD<br>68             |
| <b>D<sub>2</sub> Loss</b>  | <sup>28</sup> Si (92.23%)<br>28 | <sup>28</sup> Si <sup>32</sup> S<br>60               | <sup>28</sup> Si <sup>33</sup> S<br>61              | <sup>28</sup> Si <sup>34</sup> S<br>62              | <sup>28</sup> Si <sup>36</sup> S<br>64              |
|                            | <sup>29</sup> Si (4.68%)<br>29  | <sup>29</sup> Si <sup>32</sup> S<br>61               | <sup>29</sup> Si <sup>33</sup> S<br>62              | <sup>29</sup> Si <sup>34</sup> S<br>63              | <sup>29</sup> Si <sup>36</sup> S<br>65              |
|                            | <sup>30</sup> Si (3.09%)<br>30  | <sup>30</sup> Si <sup>32</sup> S<br>62               | <sup>30</sup> Si <sup>33</sup> S<br>63              | <sup>30</sup> Si <sup>34</sup> S<br>64              | <sup>30</sup> Si <sup>36</sup> S<br>66              |

**Table S4.** H and H<sub>2</sub> loss product mass combinations of silicon and sulfur isotopes from the reaction of ground state atomic silicon (Si(<sup>3</sup>P)) and hydrogen sulfide (H<sub>2</sub>S; X<sup>1</sup>A<sub>1</sub>). Isotope abundance given in parenthesis.

| <b>Si + H<sub>2</sub>S</b> |                                 | H <sub>2</sub> <sup>32</sup> S (94.93%)<br>34 | H <sub>2</sub> <sup>33</sup> S (0.76%)<br>35 | H <sub>2</sub> <sup>34</sup> S (4.29%)<br>36 | H <sub>2</sub> <sup>36</sup> S (0.02%)<br>38 |
|----------------------------|---------------------------------|-----------------------------------------------|----------------------------------------------|----------------------------------------------|----------------------------------------------|
| H Loss                     | <sup>28</sup> Si (92.23%)<br>28 | <sup>28</sup> Si <sup>32</sup> SH<br>61       | <sup>28</sup> Si <sup>33</sup> SH<br>62      | <sup>28</sup> Si <sup>34</sup> SH<br>63      | <sup>28</sup> Si <sup>36</sup> SH<br>65      |
|                            | <sup>29</sup> Si (4.68%)<br>29  | <sup>29</sup> Si <sup>32</sup> SH<br>62       | <sup>29</sup> Si <sup>33</sup> SH<br>63      | <sup>29</sup> Si <sup>34</sup> SH<br>64      | <sup>29</sup> Si <sup>36</sup> SH<br>66      |
|                            | <sup>30</sup> Si (3.09%)<br>30  | <sup>30</sup> Si <sup>32</sup> SH<br>63       | <sup>30</sup> Si <sup>33</sup> SH<br>64      | <sup>30</sup> Si <sup>34</sup> SH<br>65      | <sup>30</sup> Si <sup>36</sup> SH<br>67      |
| H <sub>2</sub> Loss        | <sup>28</sup> Si (92.23%)<br>28 | <sup>28</sup> Si <sup>32</sup> S<br>60        | <sup>28</sup> Si <sup>33</sup> S<br>61       | <sup>28</sup> Si <sup>34</sup> S<br>62       | <sup>28</sup> Si <sup>36</sup> S<br>64       |
|                            | <sup>29</sup> Si (4.68%)<br>29  | <sup>29</sup> Si <sup>32</sup> S<br>61        | <sup>29</sup> Si <sup>33</sup> S<br>62       | <sup>29</sup> Si <sup>34</sup> S<br>63       | <sup>29</sup> Si <sup>36</sup> S<br>65       |
|                            | <sup>30</sup> Si (3.09%)<br>30  | <sup>30</sup> Si <sup>32</sup> S<br>62        | <sup>30</sup> Si <sup>33</sup> S<br>63       | <sup>30</sup> Si <sup>34</sup> S<br>64       | <sup>30</sup> Si <sup>36</sup> S<br>66       |

**Table S5.** D and D<sub>2</sub> loss product mass combinations of silicon and sulfur isotopes from the reaction of the D1-silylidyne radical (SiD; X<sup>2</sup>Π) and deuterium sulfide (D<sub>2</sub>S; X<sup>1</sup>A<sub>1</sub>). Isotope abundance given in parenthesis.

| <b>SiD + D<sub>2</sub>S</b> |                                  | D <sub>2</sub> <sup>32</sup> S (94.93%)<br>36        | D <sub>2</sub> <sup>33</sup> S (0.76%)<br>37         | D <sub>2</sub> <sup>34</sup> S (4.29%)<br>38         | D <sub>2</sub> <sup>36</sup> S (0.02%)<br>40         |
|-----------------------------|----------------------------------|------------------------------------------------------|------------------------------------------------------|------------------------------------------------------|------------------------------------------------------|
| D Loss                      | <sup>28</sup> SiD (92.23%)<br>30 | <sup>28</sup> Si <sup>32</sup> SD <sub>2</sub><br>64 | <sup>28</sup> Si <sup>33</sup> SD <sub>2</sub><br>65 | <sup>28</sup> Si <sup>34</sup> SD <sub>2</sub><br>66 | <sup>28</sup> Si <sup>36</sup> SD <sub>2</sub><br>68 |
|                             | <sup>29</sup> SiD (4.68%)<br>31  | <sup>29</sup> Si <sup>32</sup> SD <sub>2</sub><br>65 | <sup>29</sup> Si <sup>33</sup> SD <sub>2</sub><br>66 | <sup>29</sup> Si <sup>34</sup> SD <sub>2</sub><br>67 | <sup>29</sup> Si <sup>36</sup> SD <sub>2</sub><br>69 |
|                             | <sup>30</sup> SiD (3.09%)<br>32  | <sup>30</sup> Si <sup>32</sup> SD <sub>2</sub><br>66 | <sup>30</sup> Si <sup>33</sup> SD <sub>2</sub><br>67 | <sup>30</sup> Si <sup>34</sup> SD <sub>2</sub><br>68 | <sup>30</sup> Si <sup>36</sup> SD <sub>2</sub><br>70 |
| D <sub>2</sub> Loss         | <sup>28</sup> SiD (92.23%)<br>30 | <sup>28</sup> Si <sup>32</sup> SD<br>62              | <sup>28</sup> Si <sup>33</sup> SD<br>63              | <sup>28</sup> Si <sup>34</sup> SD<br>64              | <sup>28</sup> Si <sup>36</sup> SD<br>66              |
|                             | <sup>29</sup> SiD (4.68%)<br>31  | <sup>29</sup> Si <sup>32</sup> SD<br>63              | <sup>29</sup> Si <sup>33</sup> SD<br>64              | <sup>29</sup> Si <sup>34</sup> SD<br>65              | <sup>29</sup> Si <sup>36</sup> SD<br>67              |
|                             | <sup>30</sup> SiD (3.09%)<br>32  | <sup>30</sup> Si <sup>32</sup> SD<br>64              | <sup>30</sup> Si <sup>33</sup> SD<br>65              | <sup>30</sup> Si <sup>34</sup> SD<br>66              | <sup>30</sup> Si <sup>36</sup> SD<br>68              |



**Table S6.** H, D, H<sub>2</sub>, and HD loss product mass combinations of silicon and sulfur isotopes from the reaction of the D1-silylydyne radical (SiD; X<sup>2</sup>I) and hydrogen sulfide (H<sub>2</sub>S; X<sup>1</sup>A<sub>1</sub>). Isotope abundance given in parenthesis.

| <b>SiD + H<sub>2</sub>S</b> |                                  | H <sub>2</sub> <sup>32</sup> S (94.93%)<br>34        | H <sub>2</sub> <sup>33</sup> S (0.76%)<br>35         | H <sub>2</sub> <sup>34</sup> S (4.29%)<br>36         | H <sub>2</sub> <sup>36</sup> S (0.02%)<br>38         |
|-----------------------------|----------------------------------|------------------------------------------------------|------------------------------------------------------|------------------------------------------------------|------------------------------------------------------|
| H Loss                      | <sup>28</sup> SiD (92.23%)<br>30 | <sup>28</sup> Si <sup>32</sup> SHD<br>63             | <sup>28</sup> Si <sup>33</sup> SHD<br>64             | <sup>28</sup> Si <sup>34</sup> SHD<br>65             | <sup>28</sup> Si <sup>36</sup> SHD<br>67             |
|                             | <sup>29</sup> SiD (4.68%)<br>31  | <sup>29</sup> Si <sup>32</sup> SHD<br>64             | <sup>29</sup> Si <sup>33</sup> SHD<br>65             | <sup>29</sup> Si <sup>34</sup> SHD<br>66             | <sup>29</sup> Si <sup>36</sup> SHD<br>68             |
|                             | <sup>30</sup> SiD (3.09%)<br>32  | <sup>30</sup> Si <sup>32</sup> SHD<br>65             | <sup>30</sup> Si <sup>33</sup> SHD<br>66             | <sup>30</sup> Si <sup>34</sup> SHD<br>67             | <sup>30</sup> Si <sup>36</sup> SHD<br>69             |
| D Loss                      | <sup>28</sup> SiD (92.23%)<br>30 | <sup>28</sup> Si <sup>32</sup> SH <sub>2</sub><br>62 | <sup>28</sup> Si <sup>33</sup> SH <sub>2</sub><br>63 | <sup>28</sup> Si <sup>34</sup> SH <sub>2</sub><br>64 | <sup>28</sup> Si <sup>36</sup> SH <sub>2</sub><br>66 |
|                             | <sup>29</sup> SiD (4.68%)<br>31  | <sup>29</sup> Si <sup>32</sup> SH <sub>2</sub><br>63 | <sup>29</sup> Si <sup>33</sup> SH <sub>2</sub><br>64 | <sup>29</sup> Si <sup>34</sup> SH <sub>2</sub><br>65 | <sup>29</sup> Si <sup>36</sup> SH <sub>2</sub><br>67 |
|                             | <sup>30</sup> SiD (3.09%)<br>32  | <sup>30</sup> Si <sup>32</sup> SH <sub>2</sub><br>64 | <sup>30</sup> Si <sup>33</sup> SH <sub>2</sub><br>65 | <sup>30</sup> Si <sup>34</sup> SH <sub>2</sub><br>66 | <sup>30</sup> Si <sup>36</sup> SH <sub>2</sub><br>68 |
| H <sub>2</sub> Loss         | <sup>28</sup> SiD (92.23%)<br>30 | <sup>28</sup> Si <sup>32</sup> SD<br>62              | <sup>28</sup> Si <sup>33</sup> SD<br>63              | <sup>28</sup> Si <sup>34</sup> SD<br>64              | <sup>28</sup> Si <sup>36</sup> SD<br>66              |
|                             | <sup>29</sup> SiD (4.68%)<br>31  | <sup>29</sup> Si <sup>32</sup> SD<br>63              | <sup>29</sup> Si <sup>33</sup> SD<br>64              | <sup>29</sup> Si <sup>34</sup> SD<br>65              | <sup>29</sup> Si <sup>36</sup> SD<br>67              |
|                             | <sup>30</sup> SiD (3.09%)<br>32  | <sup>30</sup> Si <sup>32</sup> SD<br>64              | <sup>30</sup> Si <sup>33</sup> SD<br>65              | <sup>30</sup> Si <sup>34</sup> SD<br>66              | <sup>30</sup> Si <sup>36</sup> SD<br>68              |
| HD Loss                     | <sup>28</sup> SiD (92.23%)<br>30 | <sup>28</sup> Si <sup>32</sup> SH<br>61              | <sup>28</sup> Si <sup>33</sup> SH<br>62              | <sup>28</sup> Si <sup>34</sup> SH<br>63              | <sup>28</sup> Si <sup>36</sup> SH<br>65              |
|                             | <sup>29</sup> SiD (4.68%)<br>31  | <sup>29</sup> Si <sup>32</sup> SH<br>62              | <sup>29</sup> Si <sup>33</sup> SH<br>63              | <sup>29</sup> Si <sup>34</sup> SH<br>64              | <sup>29</sup> Si <sup>36</sup> SH<br>66              |
|                             | <sup>30</sup> SiD (3.09%)<br>32  | <sup>30</sup> Si <sup>32</sup> SH<br>63              | <sup>30</sup> Si <sup>33</sup> SH<br>64              | <sup>30</sup> Si <sup>34</sup> SH<br>65              | <sup>30</sup> Si <sup>36</sup> SH<br>67              |

**Table S7.** Fractional abundance ranges for SiS in the Orion Sources shown in Figure 13.

| Source                        | Light Grey                   | Dark Grey                    | Light Grey                   |
|-------------------------------|------------------------------|------------------------------|------------------------------|
| Orion Hot Core                | $(1.8-5.4) \times 10^{-10}$  | $(5.4-8.8) \times 10^{-10}$  | $(8.8-26.4) \times 10^{-10}$ |
| Orion Plateau                 | $(0.43-1.29) \times 10^{-9}$ | $(1.29-2.05) \times 10^{-9}$ | $(2.05-6.14) \times 10^{-9}$ |
| Orion 15.5 km s <sup>-1</sup> | $(1.76-5.3) \times 10^{-9}$  | $(5.3-8.7) \times 10^{-9}$   | $(8.7-26.1) \times 10^{-9}$  |

## References

1. D. Proch and T. Trickl, *Review of Scientific Instruments*, 1989, **60**, 713-716.
2. T. Shiozaki, G. Knizia and H.-J. Werner, *The Journal of Chemical Physics*, 2011, **134**, 034113.
