# Supplementary figures and images for: Chemical dynamics study on the gas-phase reaction of the D1-silylidyne radical (SiD; X2Π) with deuterium sulfide (D2S) and hydrogen sulfide (H2S)
Source: Royal Society of Chemistry journal article supplement (doi:10.1039/d1cp01629f), 2021-01-01

Four-slot chopper  
wheel with photodiode

$$f = 480 \text{ Hz}$$
$$T = 0 \text{ } \mu\text{s}$$

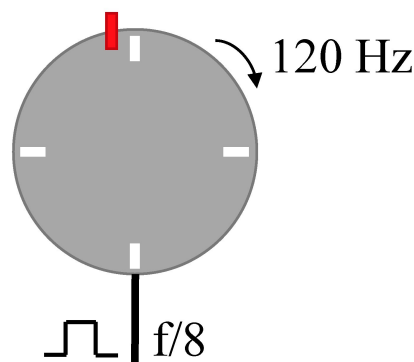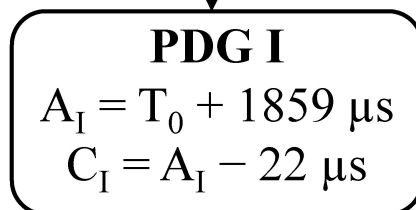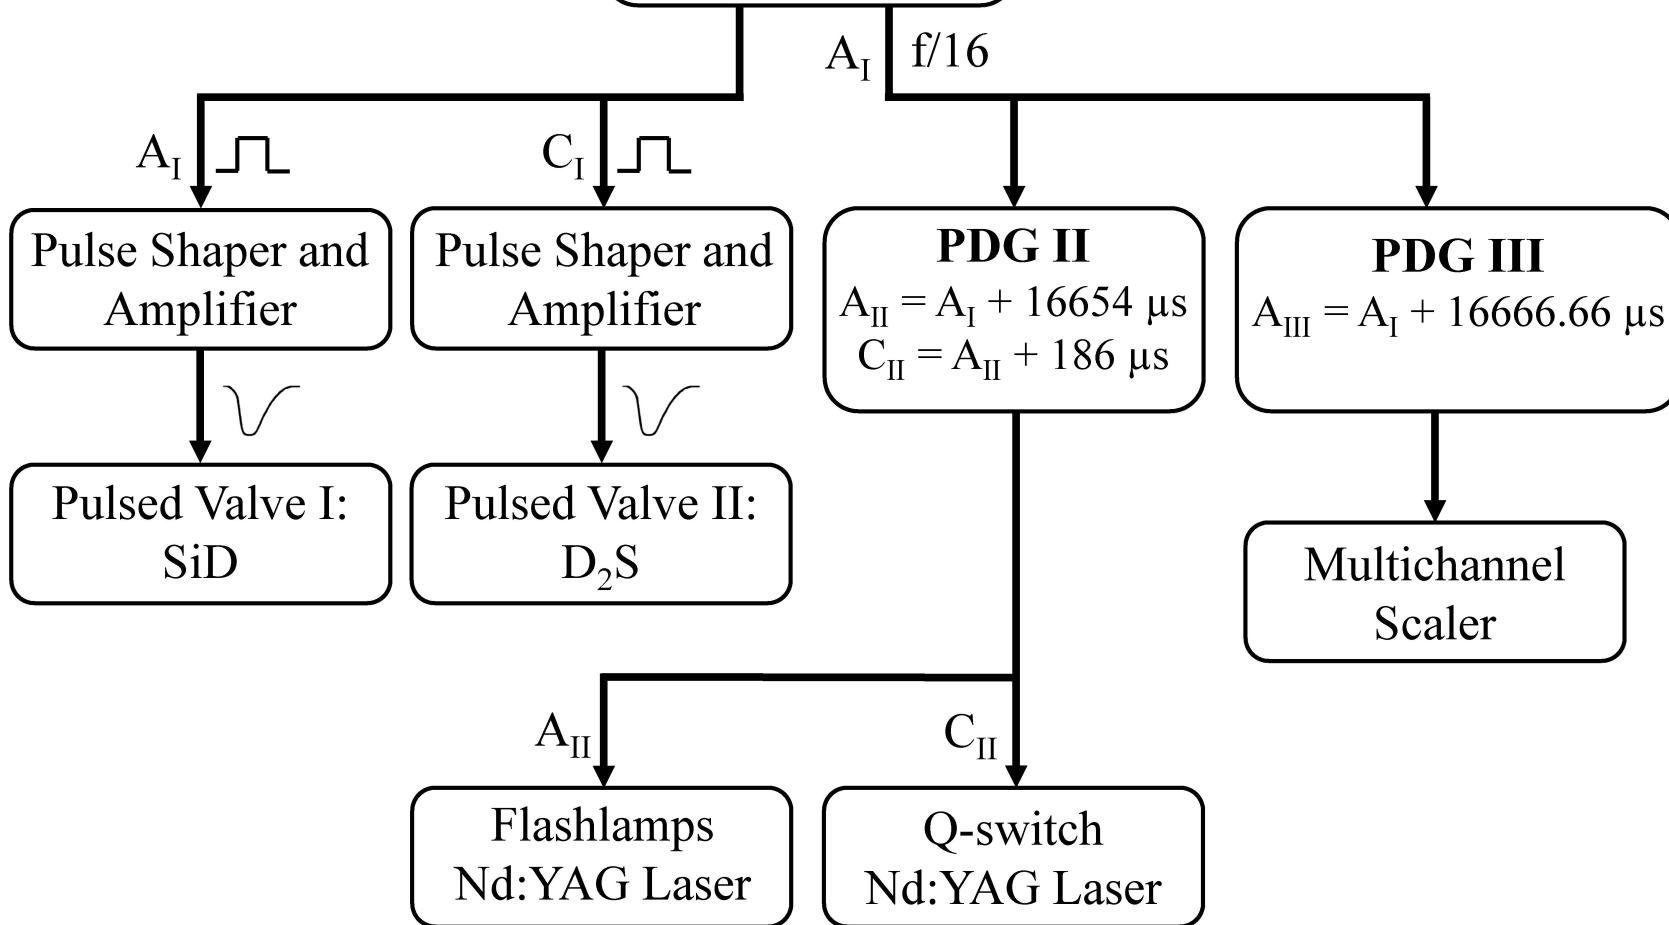

Supplement: d1cp01629f1.pdf [file d1cp01629f1.pdf]

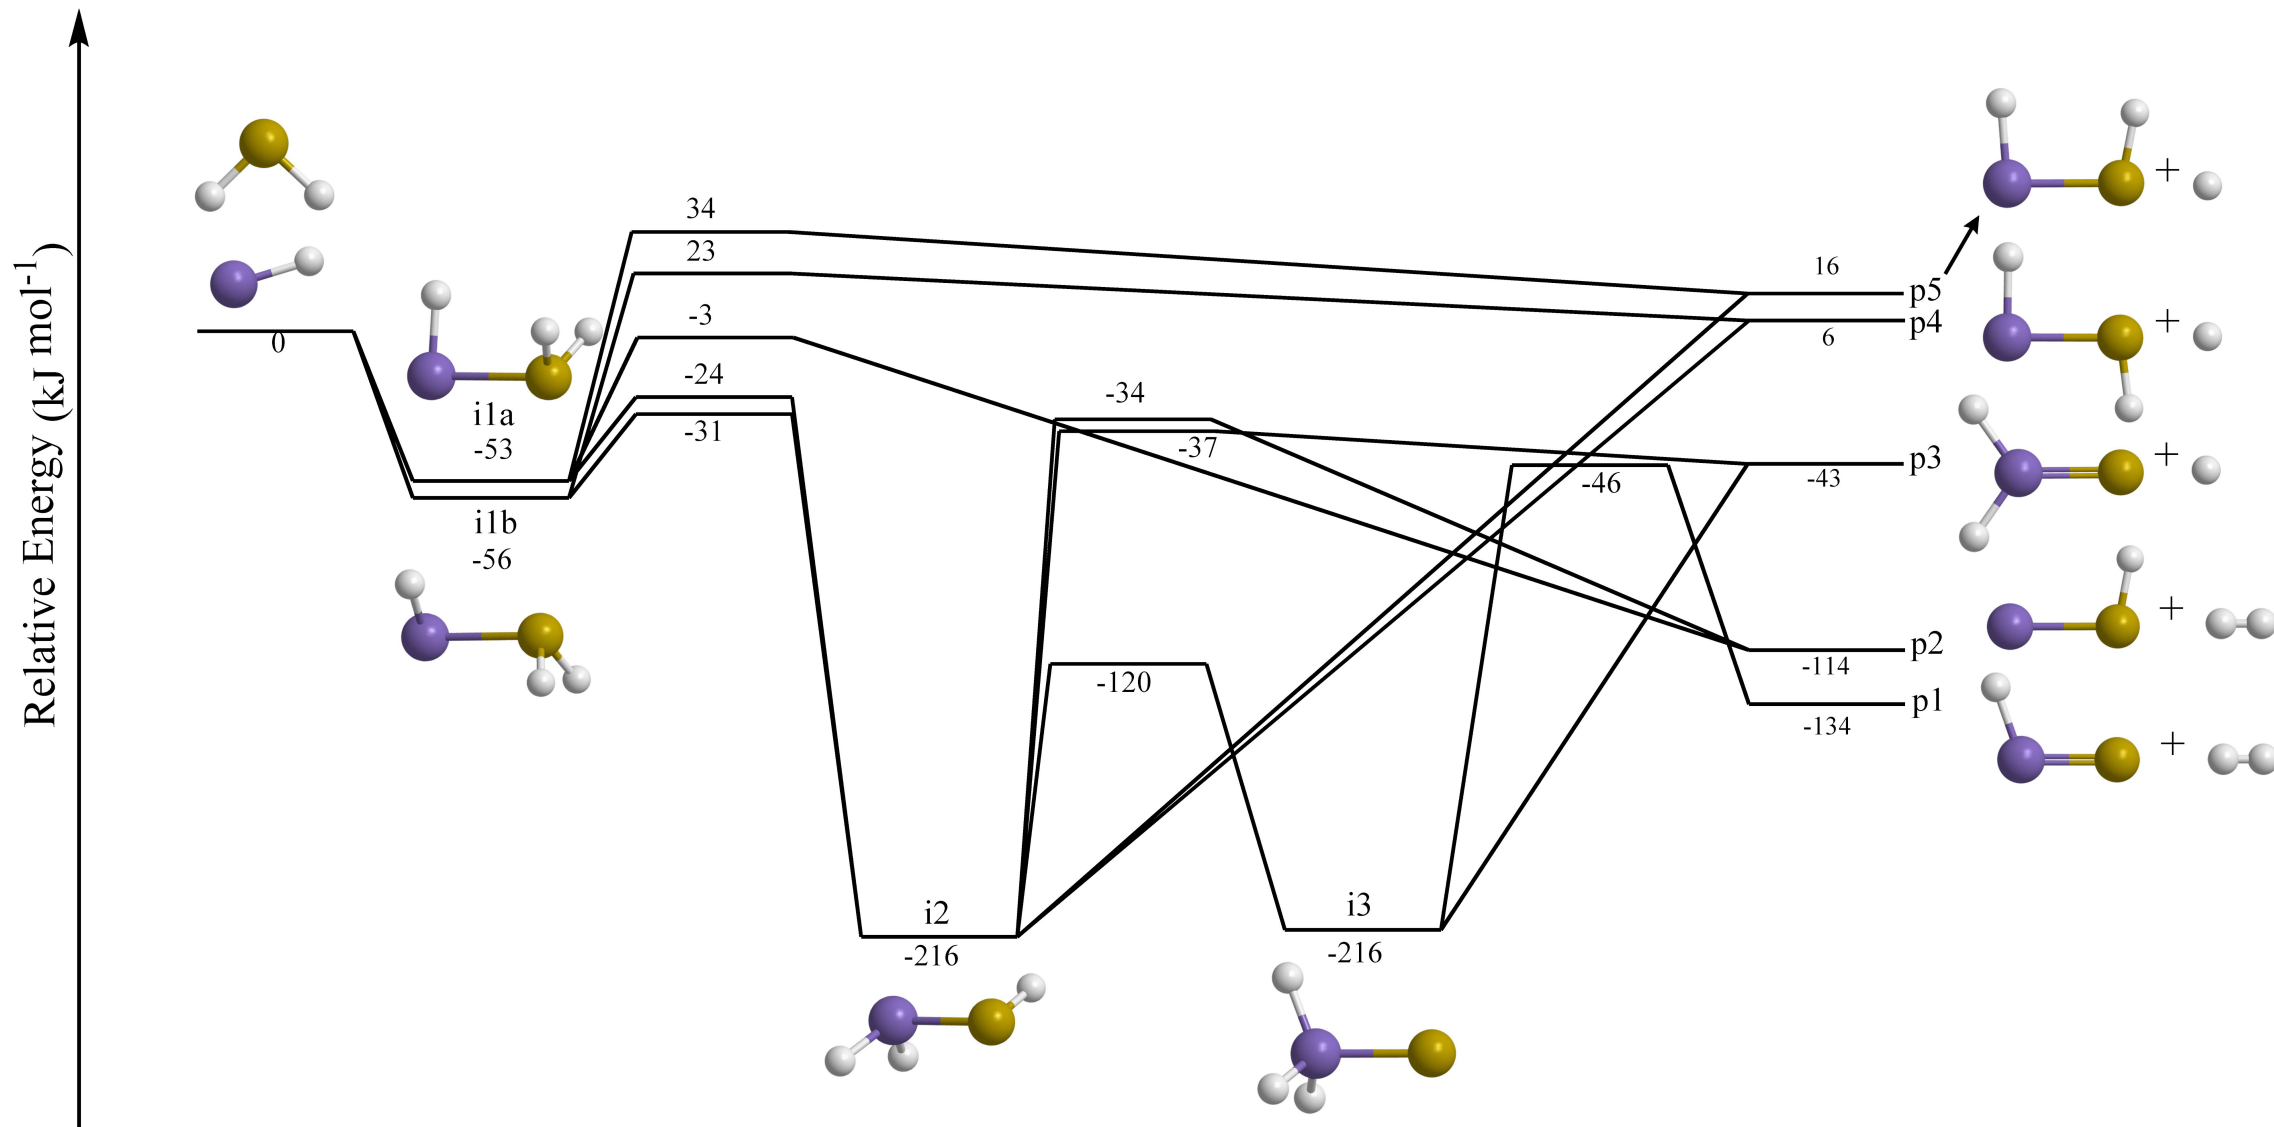

Supplement: d1cp01629f2.pdf [file d1cp01629f2.pdf]

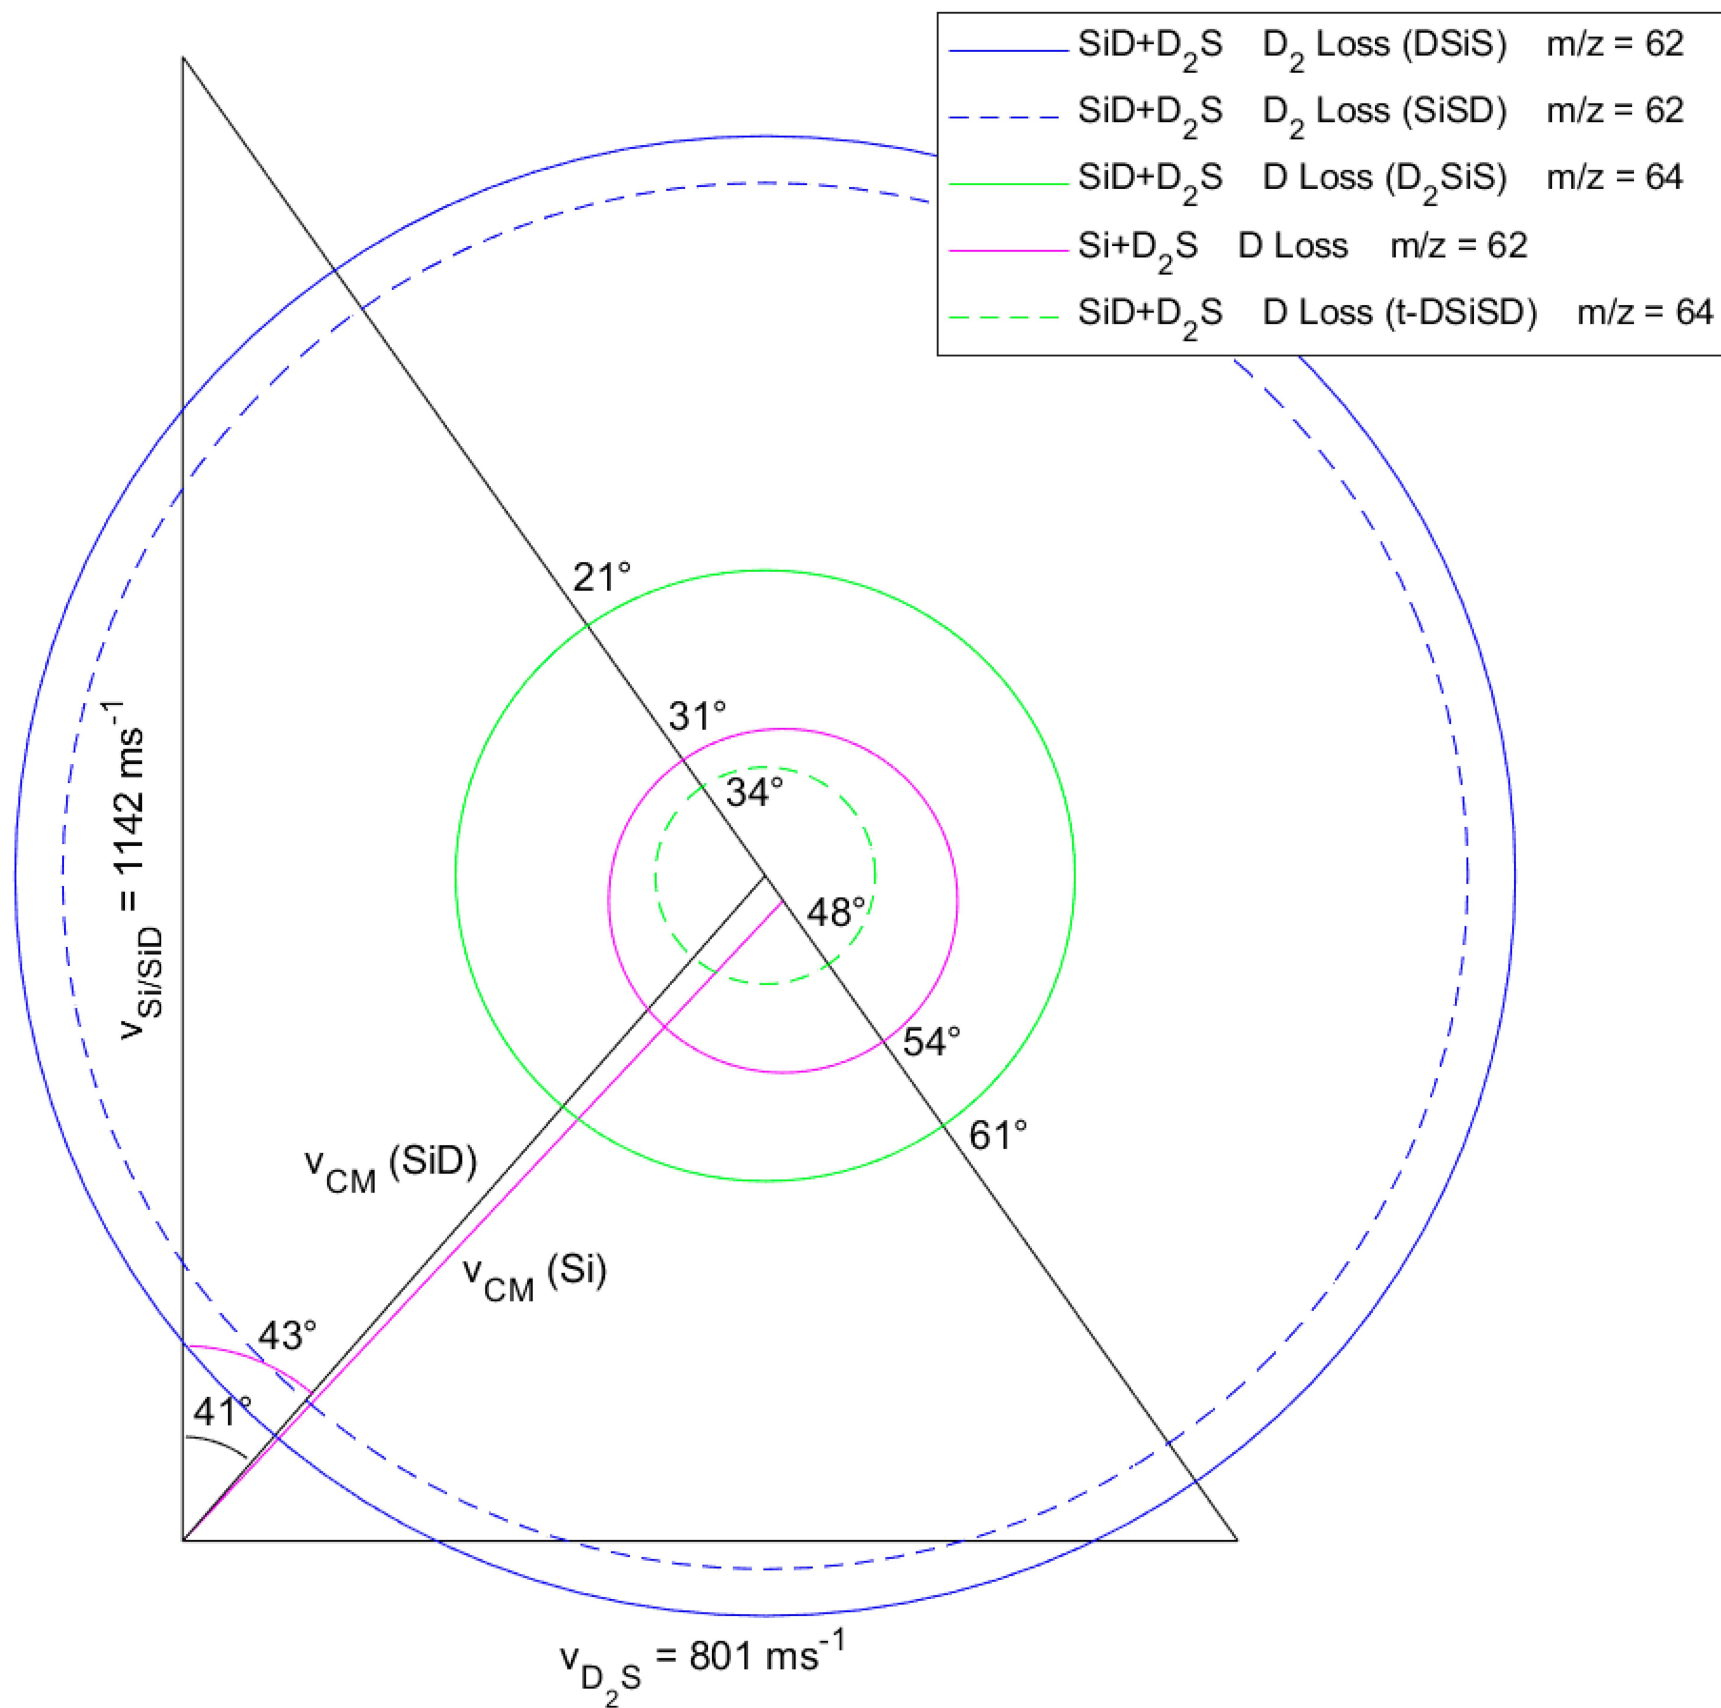

Supplement: d1cp01629f3.pdf [file d1cp01629f3.pdf]

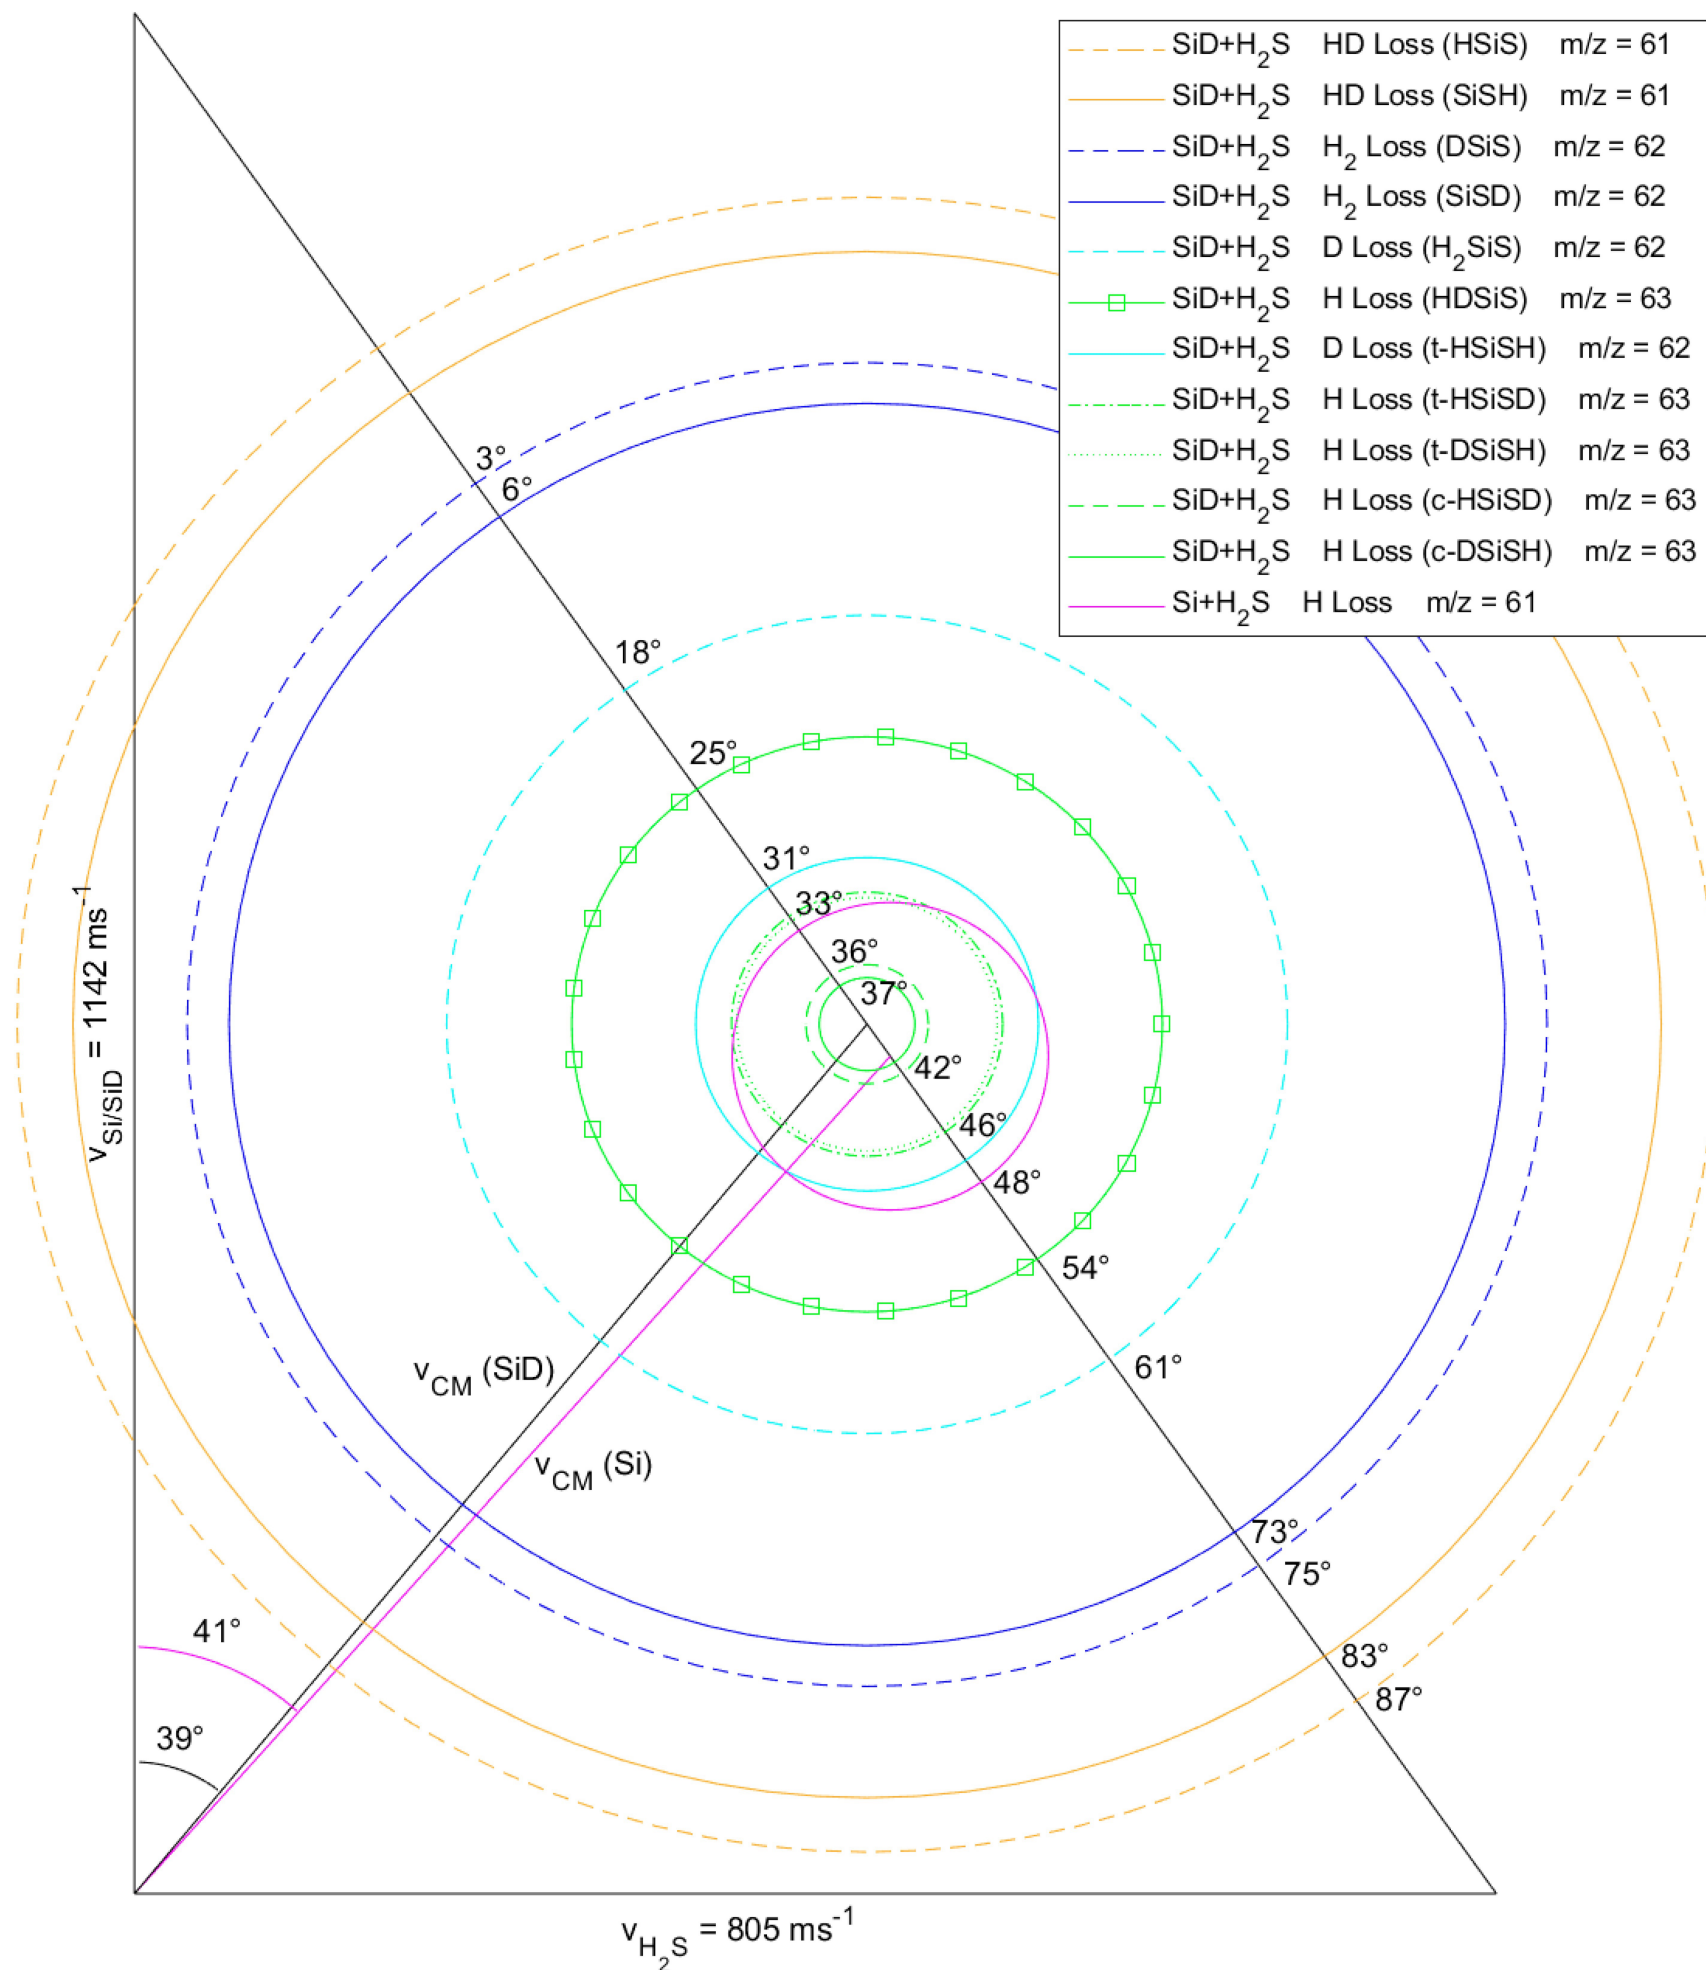

Supplement: d1cp01629f4.pdf [file d1cp01629f4.pdf]

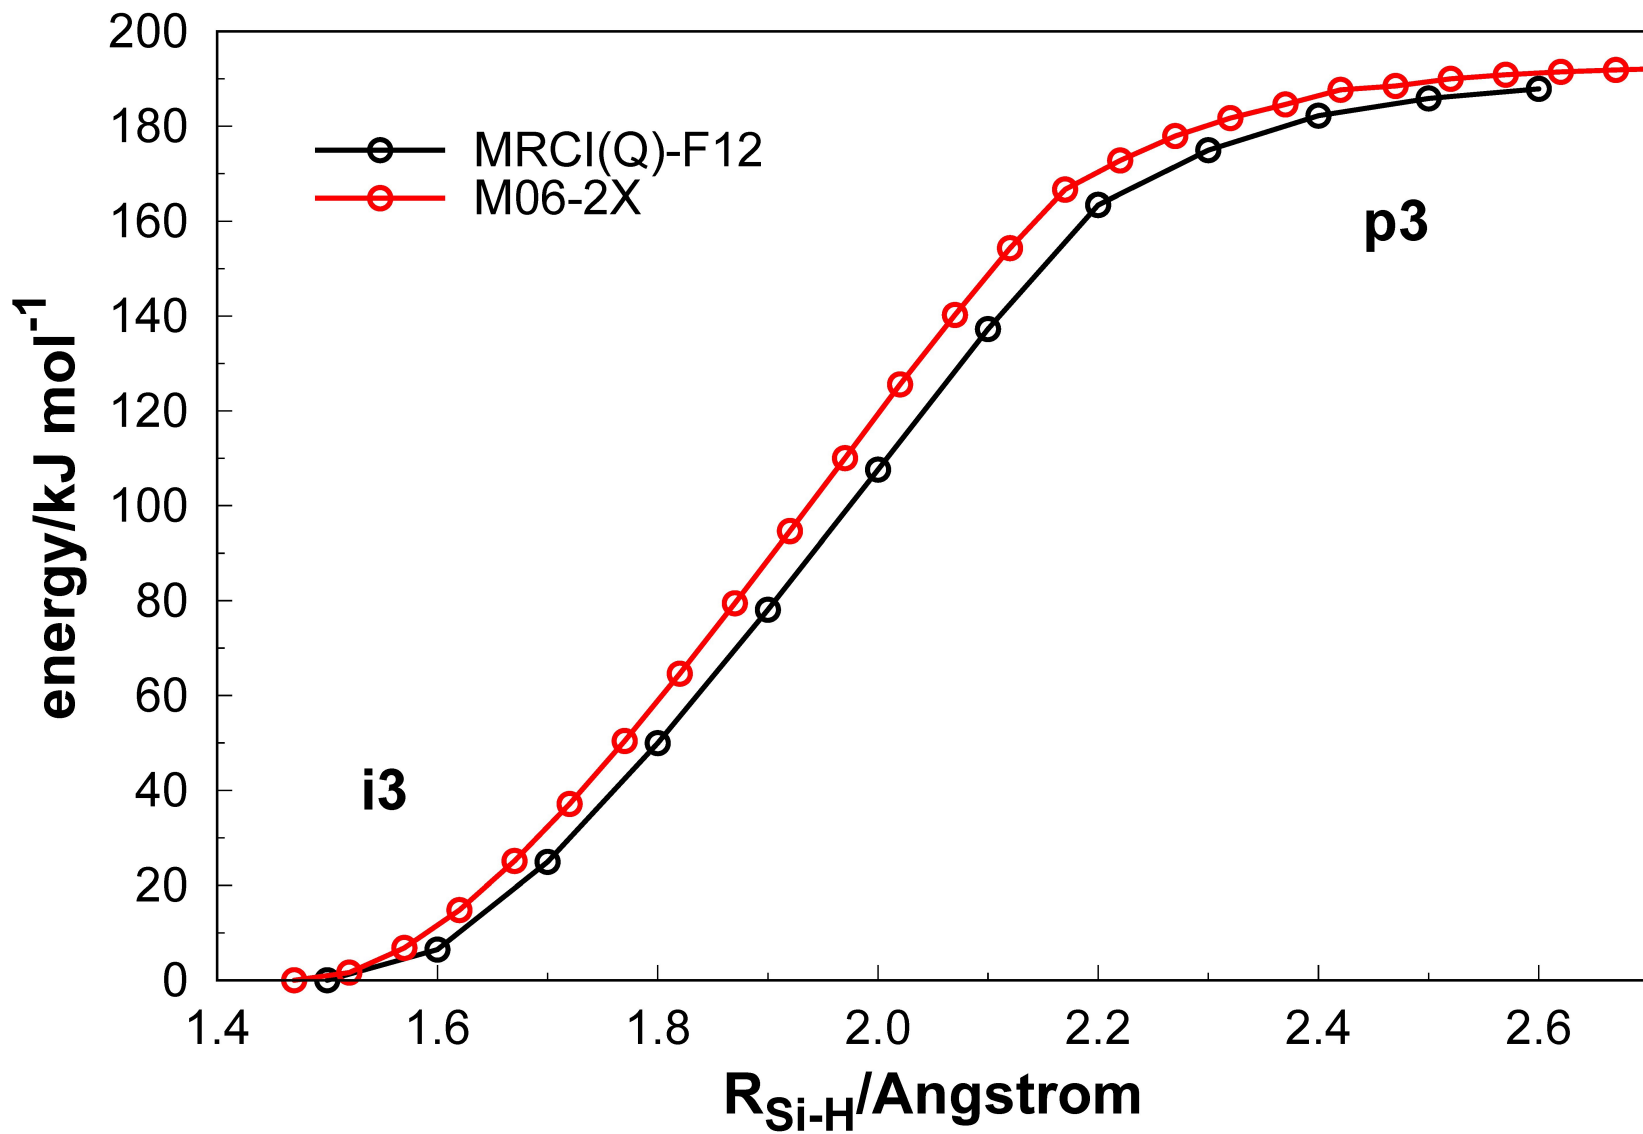

Supplement: d1cp01629f5.pdf [file d1cp01629f5.pdf]
